# Supplementary material
Source: PubMed Central journal article supplement (PMC10114242)

## Supplementary Materials

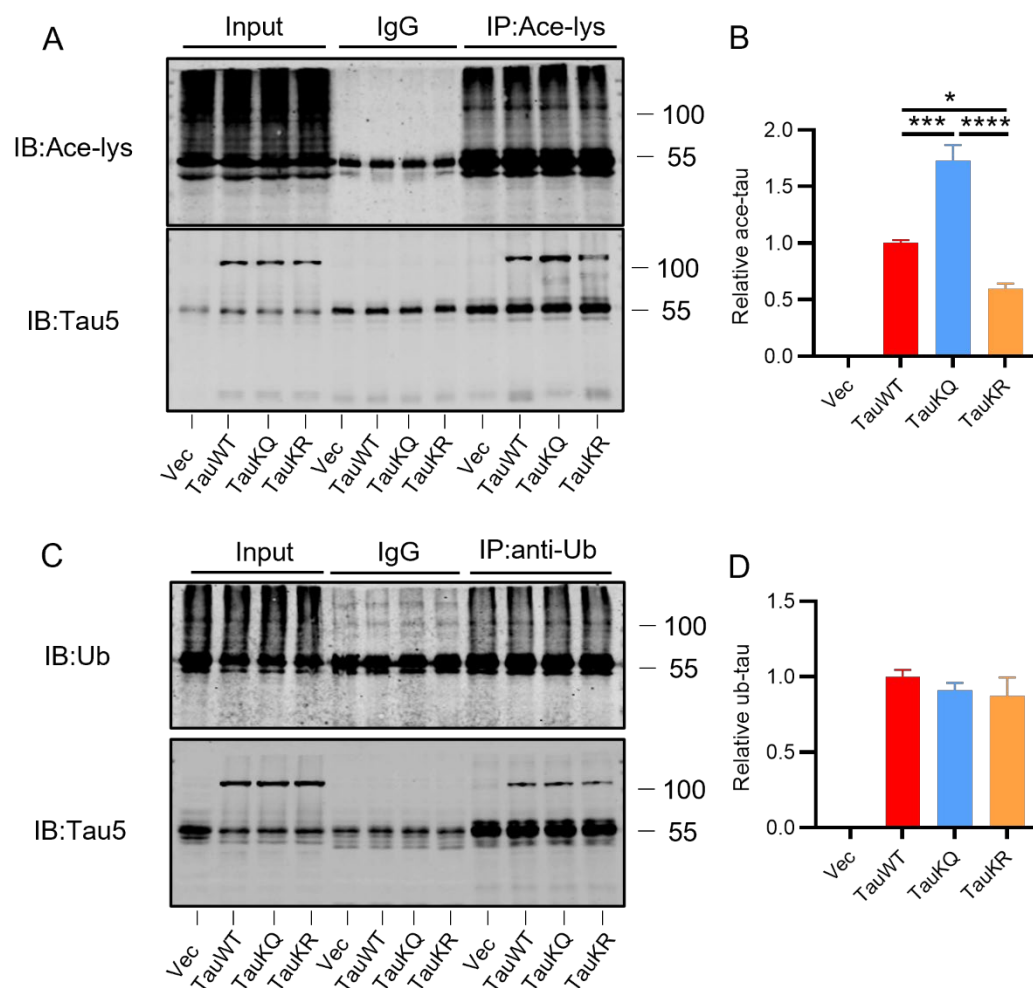

**Fig. S1. The K274/281Q and K274/281R mutations altered only the level of tau acetylation, not the level of tau ubiquitination.**

(A, B) The hippocampal CA1 subset of 2-month-old C57 mice were infected with the one of three types of tau or empty vector virus for one month, and then the homogenates of CA1 region (virus transfection) were used to immunoprecipitate by anti-acetylated lysine (Ace-lys) and Western blotting by anti-Ace-lys and Tau5 (detecting total Tau) (A). The exogenous tau (~106kDa, human tau) was used to quantify (B) (n = 4 biological replicates each group).

(C, D) The hippocampal CA1 subset of 2-month-old C57 mice were infected with the one of three types of tau or empty vector virus for one month, and then the homogenates of CA1 region (virus transfection) were used to immunoprecipitate by anti-Ubiquitin (Ub) and Western blotting by anti-Ub and Tau5 (detecting total Tau) (C). The exogenous tau

(~106kDa, human tau) was used to quantify (D) (n = 4 biological replicates each group). All data were presented as mean ± SEM. One-way ANOVA test followed by Tukey's post hoc test. \*,  $p < 0.05$ , \*\*\*,  $p < 0.001$ , \*\*\*\*,  $p < 0.0001$ .

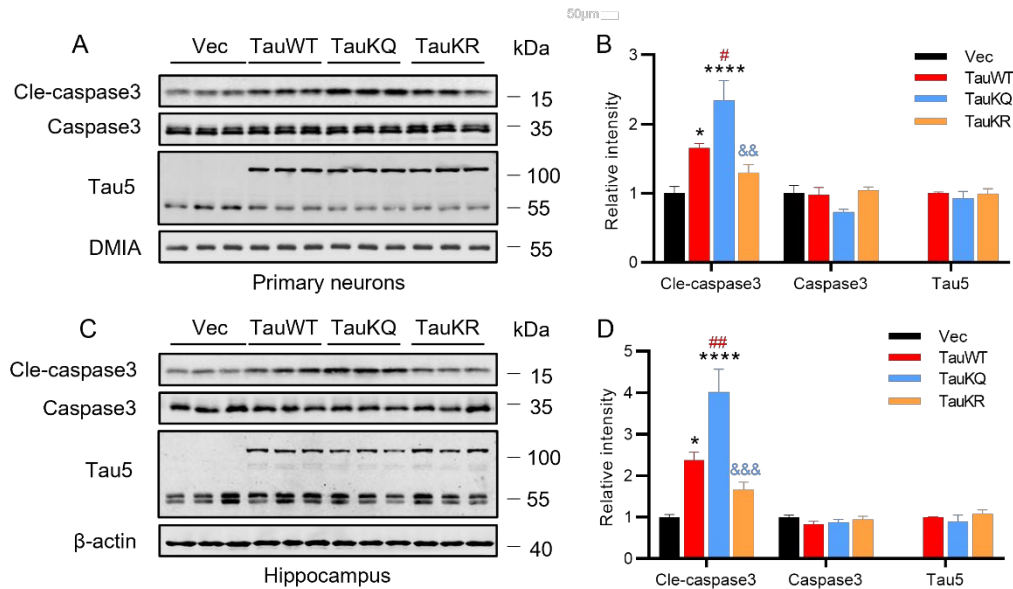

**Fig. S2. Overexpressing TauKQ promoted neuron apoptosis.**

(A, B) The expression level of Cleaved caspase-3 (Cle-caspase3), Caspase-3 and total Tau (Tau5) were detected by Western blotting (A) and quantitative analysis (B) in primary cultured hippocampal neurons after transfection with all three types of tau lentivirus (n = 6 biological replicates each group). All quantification of Tau5 in this manuscript is done with exogenous tau (~106kDa, human tau).

(C, D) The expression level of Cleaved caspase-3 (Cle-caspase3) and Caspase-3 were detected by Western blotting (C) and quantitative analysis (D) in the extracts of overexpressing the three types of tau or empty vector in hippocampal CA1 subset (n = 6 biological replicates each group).

All data were presented as mean ± SEM. One-way ANOVA test followed by Tukey's post hoc test. \*,  $p < 0.05$ , \*\*\*\*,  $p < 0.0001$ , vs Vec; #,  $p < 0.05$ , ###,  $p < 0.01$ , vs TauWT; &&,  $p < 0.01$ , &&&,  $p < 0.001$ , vs TauKQ.

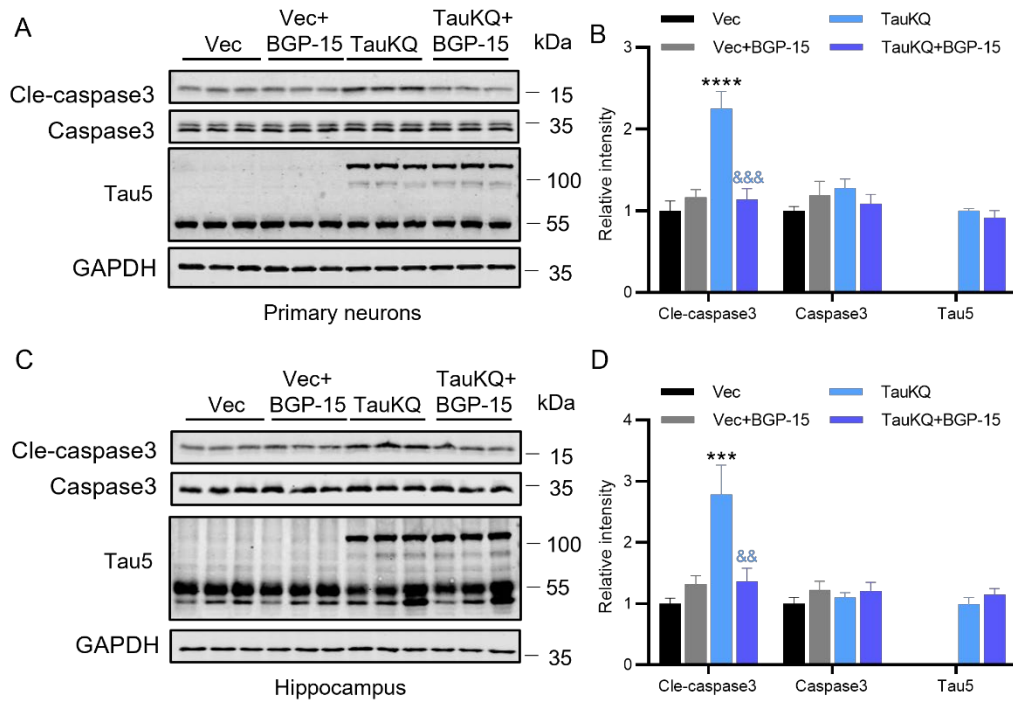

**Fig. S3. BGP-15 ameliorated tauKQ-induced apoptosis.**

(A, B) The primary cultured hippocampal neurons were infected with the lenti-TauKQ at 2 div, and 10  $\mu$ M BGP-15 was treated at 3 div, half-change the culture medium every other day until sample collection at 8 div. The expression level of Cleaved caspase-3 (Cle-caspase3), Caspase-3 and total tau were detected by Western blotting (A) and quantitative analysis (B) (n = 6 biological replicates each group).

(C, D) The expression level of Cleaved caspase-3 (Cle-caspase3), Caspase-3 and total tau in the extracts of hippocampal CA1 region were detected by Western blotting (C) and quantitative analysis (D) (n = 6 biological replicates each group).

All data were presented as mean  $\pm$  SEM. One-way ANOVA test followed by Tukey's post hoc test. \*\*\*,  $p < 0.001$ , \*\*\*\*,  $p < 0.0001$ , vs Vec; &&,  $p < 0.01$ , &&&,  $p < 0.001$ , vs TauKQ.

Table S1. Antibodies used in the present study

| Antibody                     | Source / Identifier     | Dilution   |
|------------------------------|-------------------------|------------|
| Anti-Tau5                    | Abcam, ab80579          | WB: 1:1000 |
| Anti-Mitofusin 1             | Abcam, ab126575         | WB: 1:1000 |
| Anti-Mitofusin 2             | CST, 9482S              | WB: 1:1000 |
| Anti-OPA1                    | Abcam, ab157457         | WB: 1:300  |
| Anti-DRP1                    | Abcam, ab184247         | WB: 1:1000 |
| Anti-Fis1                    | Proteintech, 66635-1-Ig | WB: 1:300  |
| Anti-PGC1 alpha              | Abcam, ab54481          | WB: 1:500  |
| Anti-PGC1 alpha              | Proteintech, 66369-1-Ig | WB: 1:500  |
| Anti-NRF1                    | Abclonal, A3252         | WB: 1:2000 |
| Anti-TFAM                    | Proteintech, 22586-1-AP | WB: 1:300  |
| Anti-TFAM                    | Abcam, ab131607         | WB: 1:500  |
| Anti-TOMM40                  | Santa Cruz, sc-365467   | WB: 1:500  |
| Anti-Caspase3                | CST, 9662S              | WB: 1:500  |
| Anti-Cleaved caspase3        | CST, 9661S              | WB: 1:300  |
| Anti-LC3B                    | Abcam, ab51520          | WB: 1:500  |
| Anti-P62/SQSTM1              | Abcam, ab56416          | WB: 1:1000 |
| Anti-mitochondrial OXPHOS    | Abcam, ab110413         | WB: 1:1000 |
| Anti-MAP2                    | Abcam, ab32454          | IF: 1:500  |
| Anti-NeuN                    | Millipore, ABN78        | IF: 1:200  |
| Anti-GAPDH                   | Proteintech, 60004-1-Ig | WB: 1:5000 |
| Anti- $\beta$ -actin         | Abclonal, AC026         | WB: 1:3000 |
| Anti- $\alpha$ -tubulin/DMIA | Abclonal, AC012         | WB: 1:3000 |
| Anti-DAPI                    | Beyotime, C1002         | IF: 1:1000 |
| Anti-Acetylated-Lysine       | CST, 9441S              | IP: 1:50   |
| Anti-Ubiquitin               | Santa Cruz, sc-8017     | IP: 1:50   |

### Source Data for Figure 2A

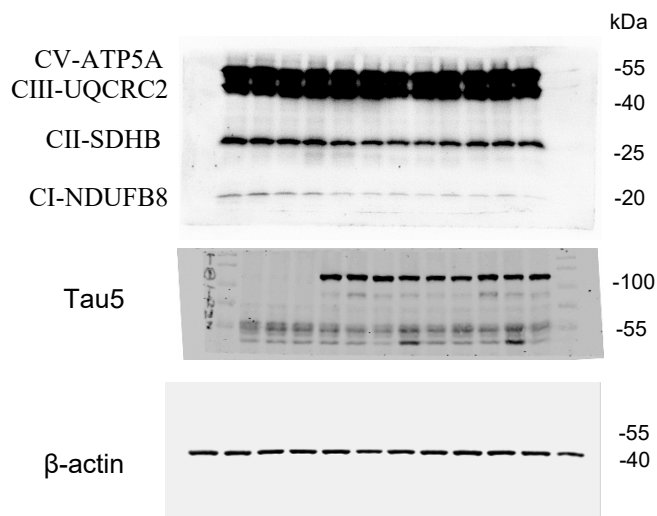

### Source Data for Figure 3A

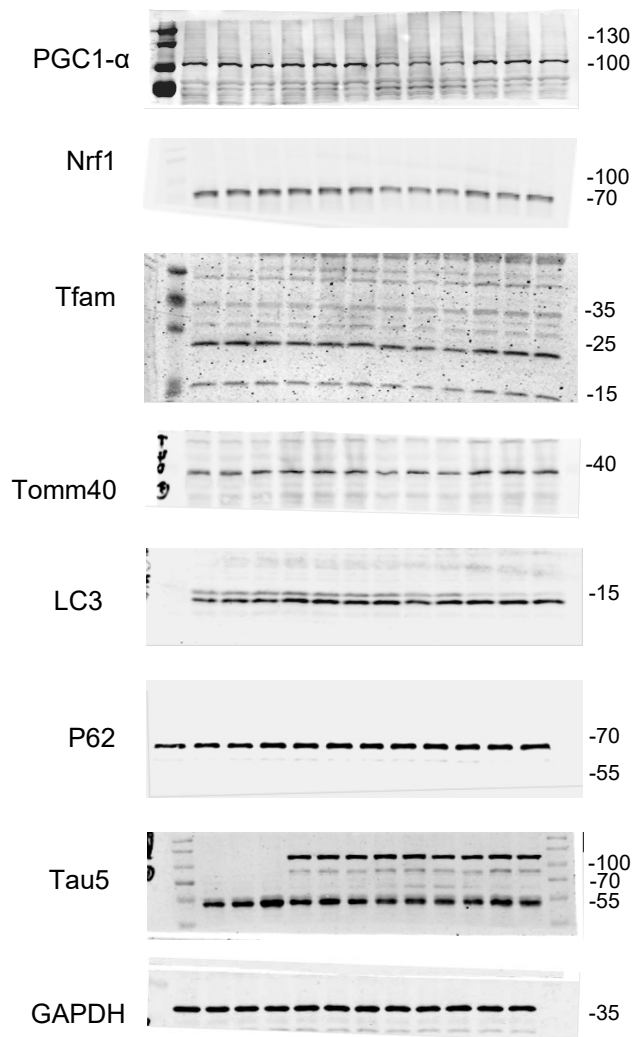

**Source Data for Figure 3C**

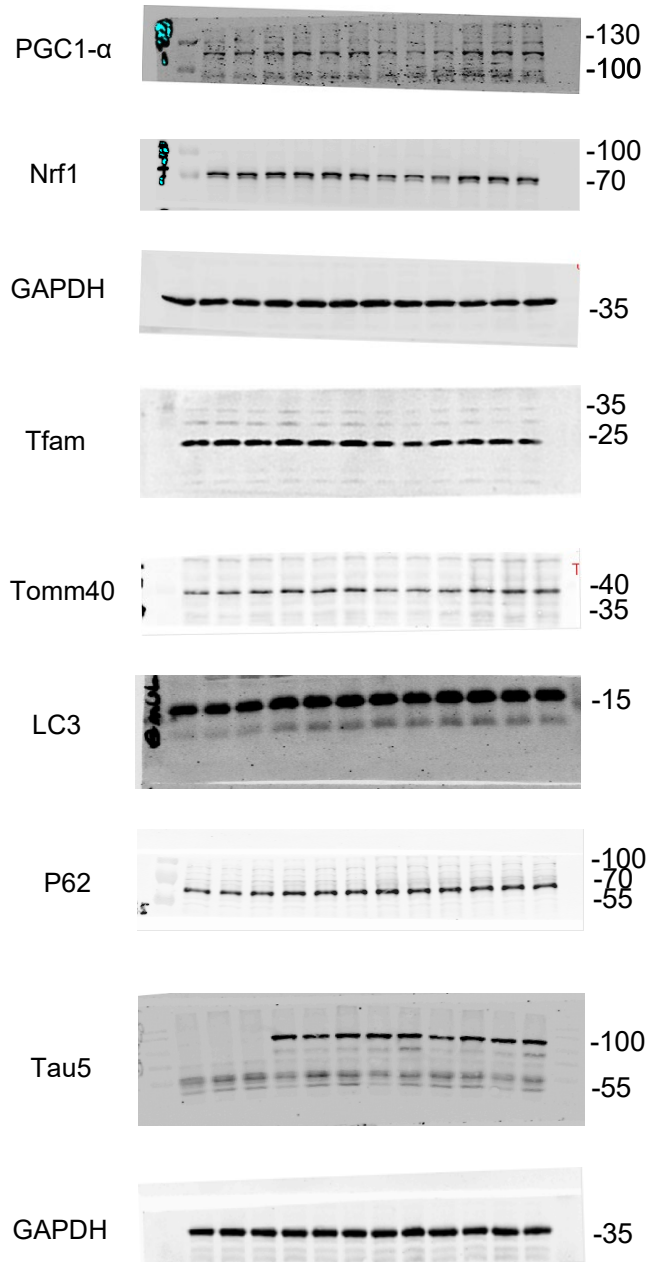

**Source Data for Figure 4A**

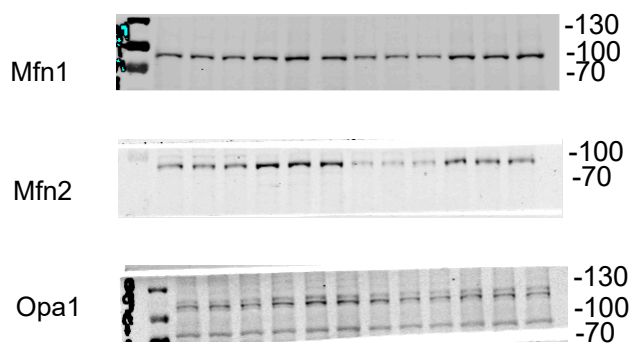

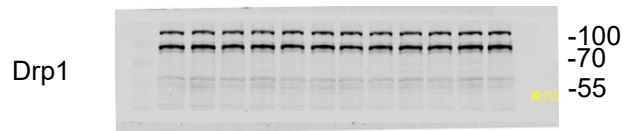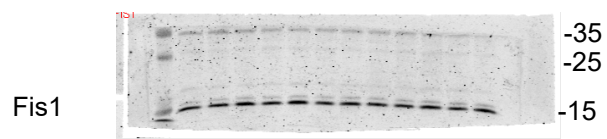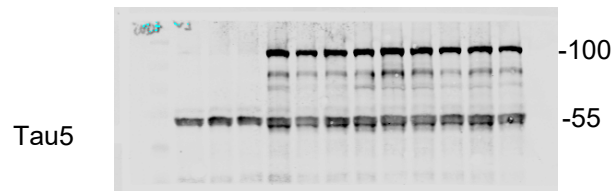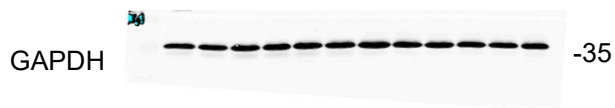

**Source Data for Figure 4F**

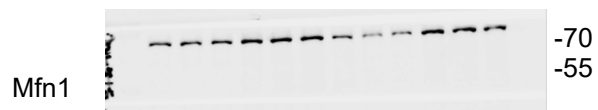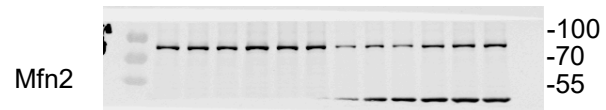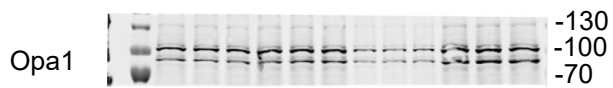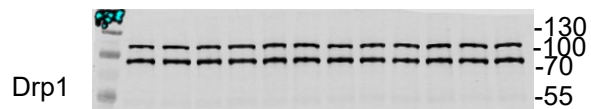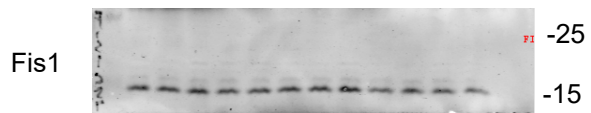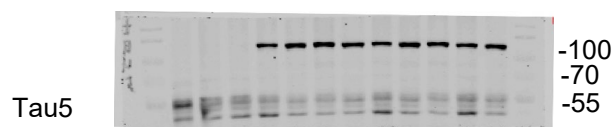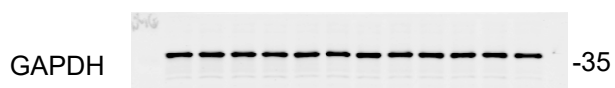

### Source Data for Figure 5A

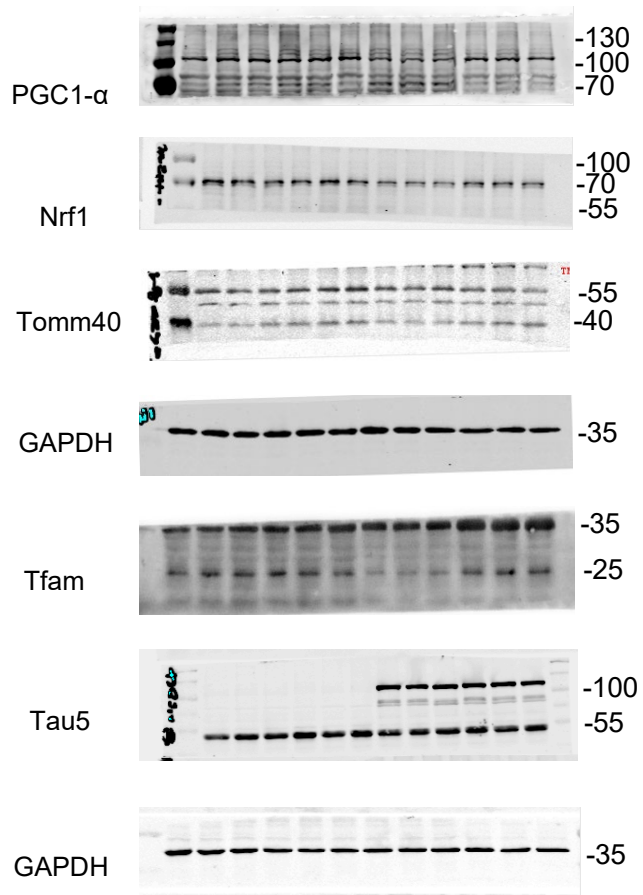

### Source Data for Figure 5C

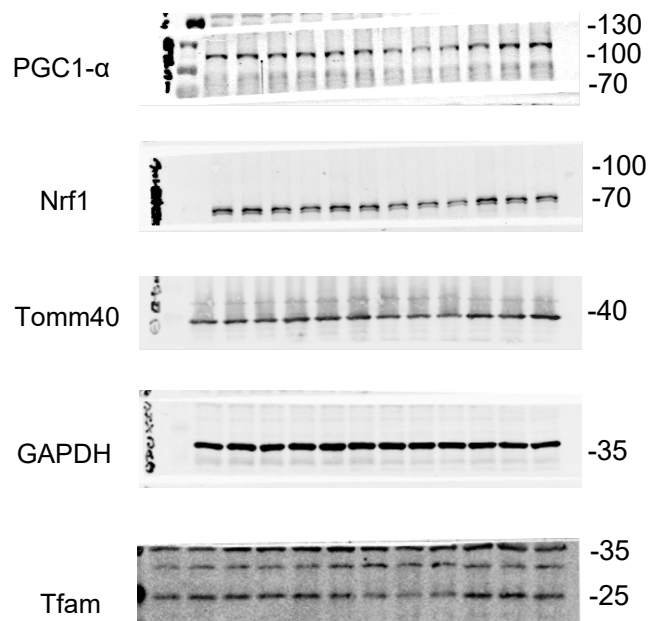



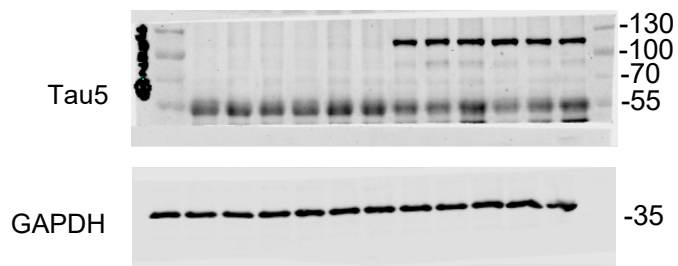

**Source Data for Figure 6A**

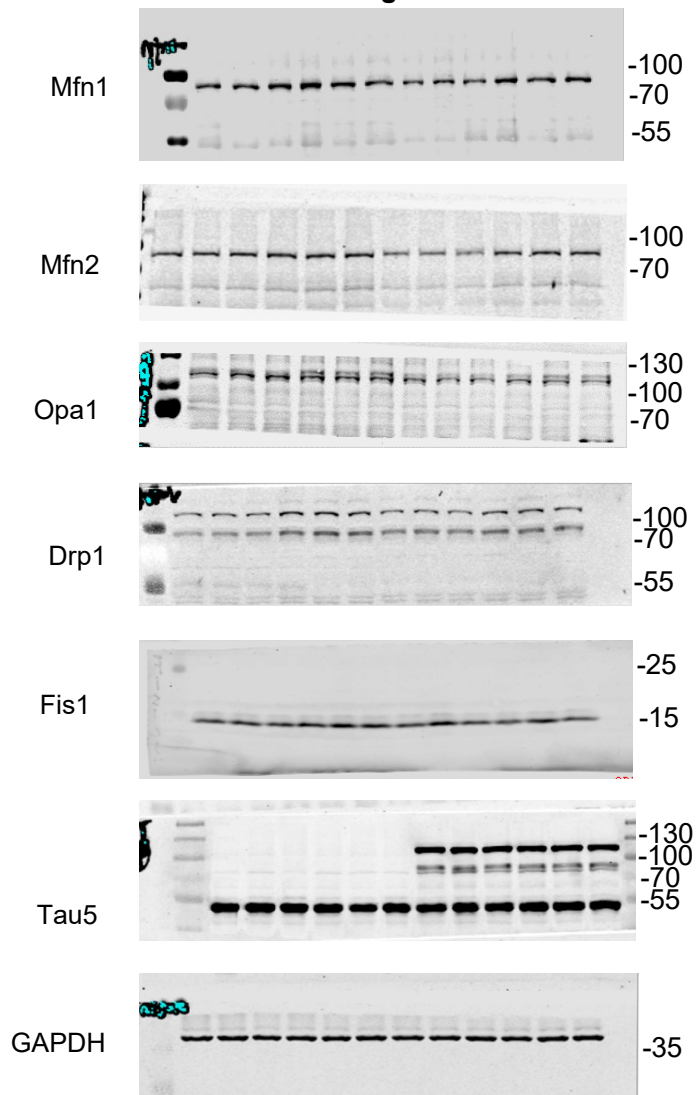

Source Data for Figure 6E

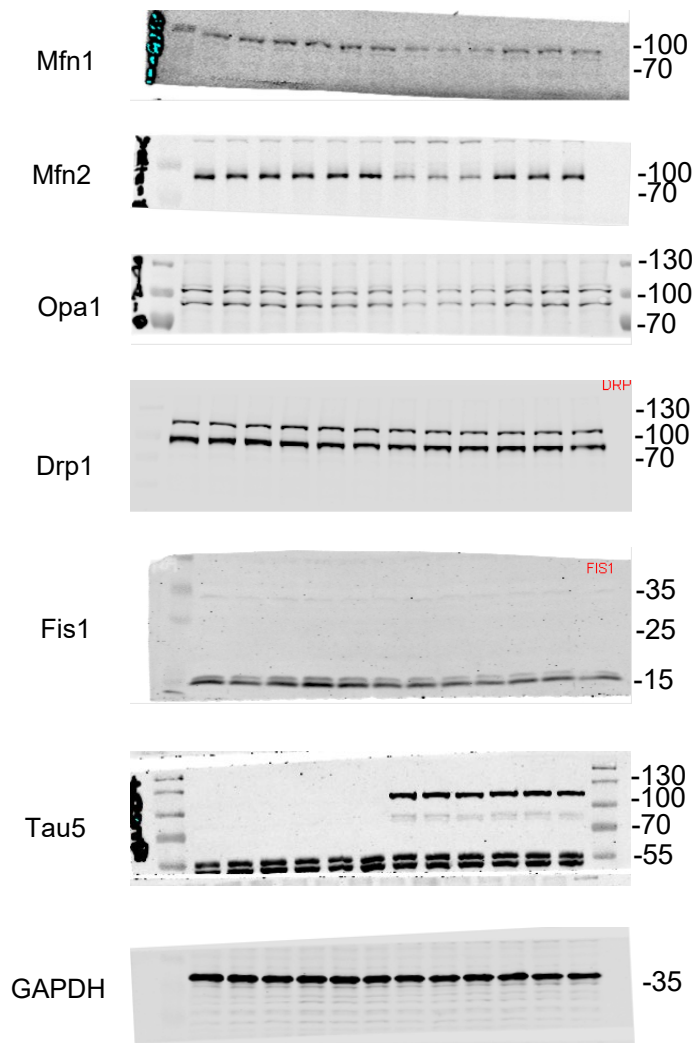

Source Data for Figure S1 A

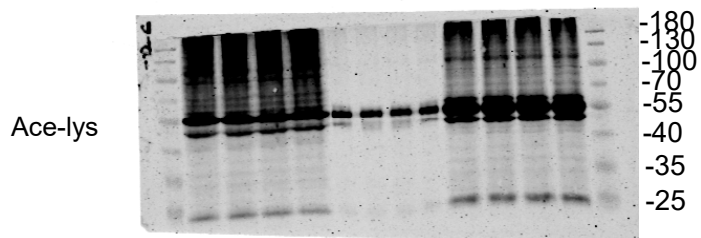

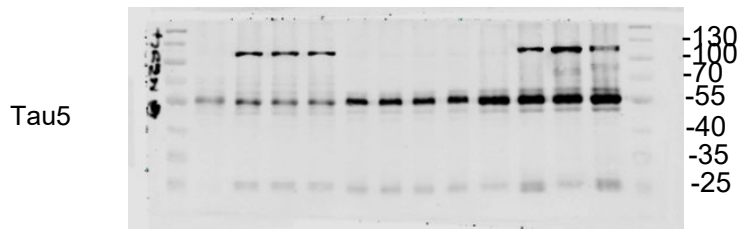

**Source Data for Figure S1 C**

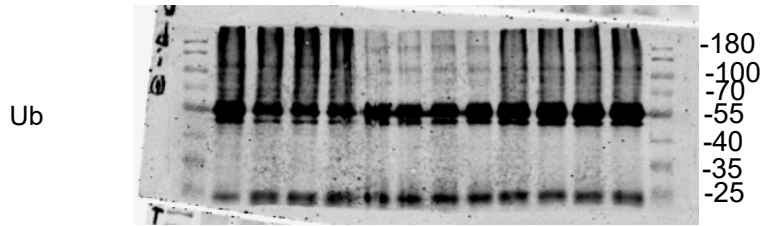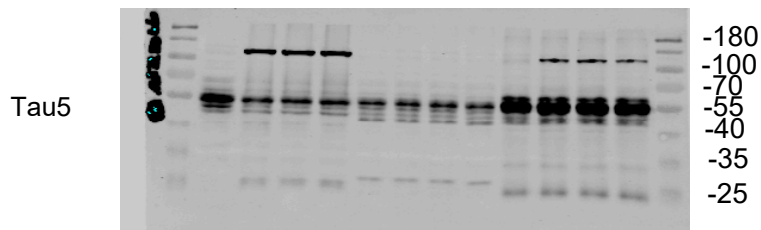

**Source Data for Figure S2 A**

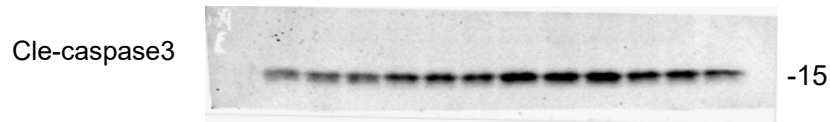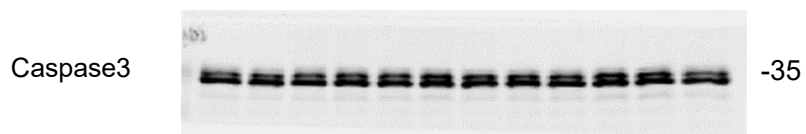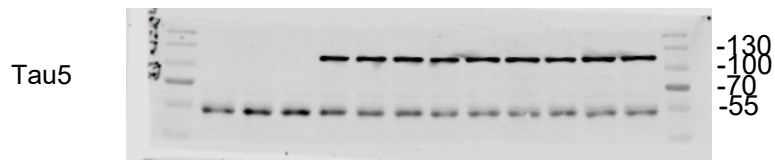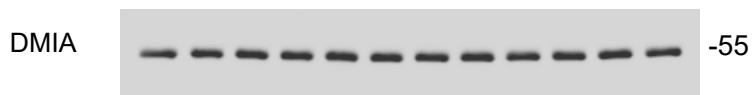

Source Data for Figure S2 C

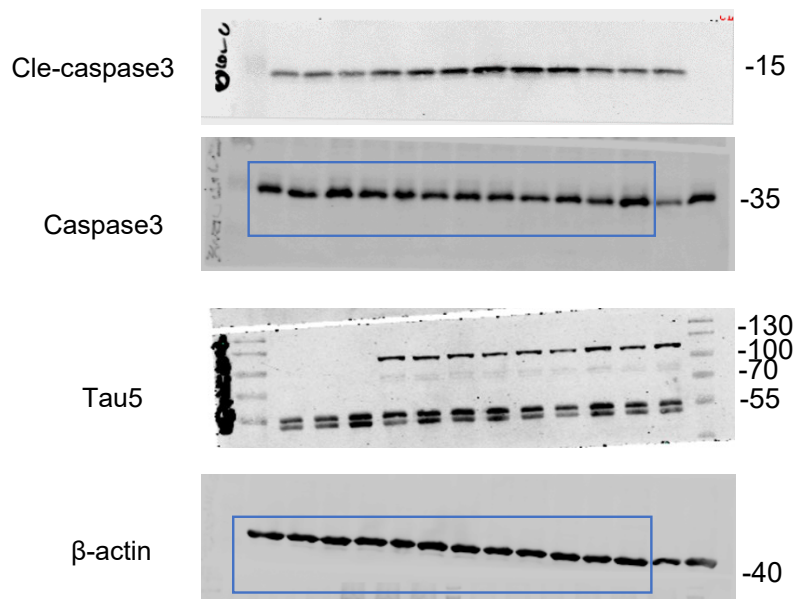

Source Data for Figure S3 A

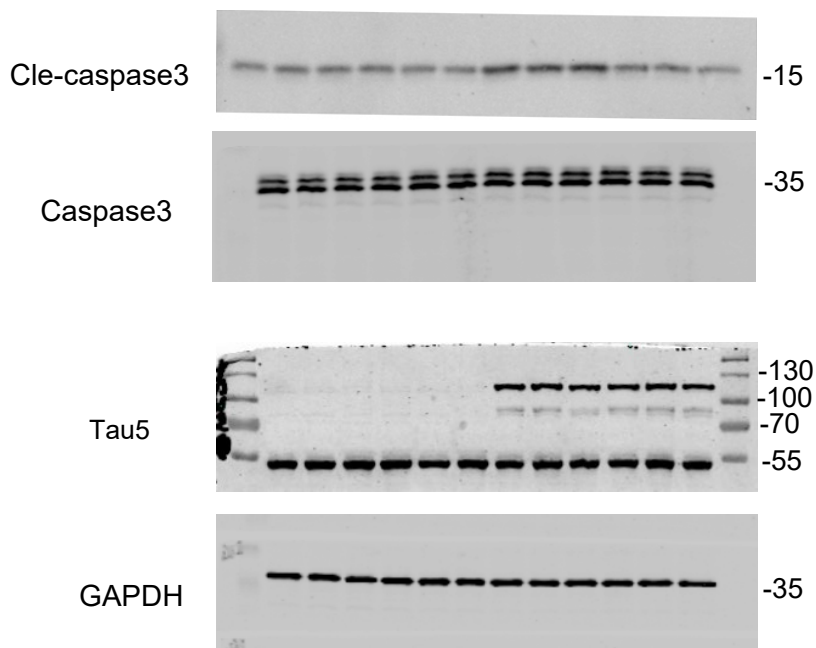

Source Data for Figure S3 C

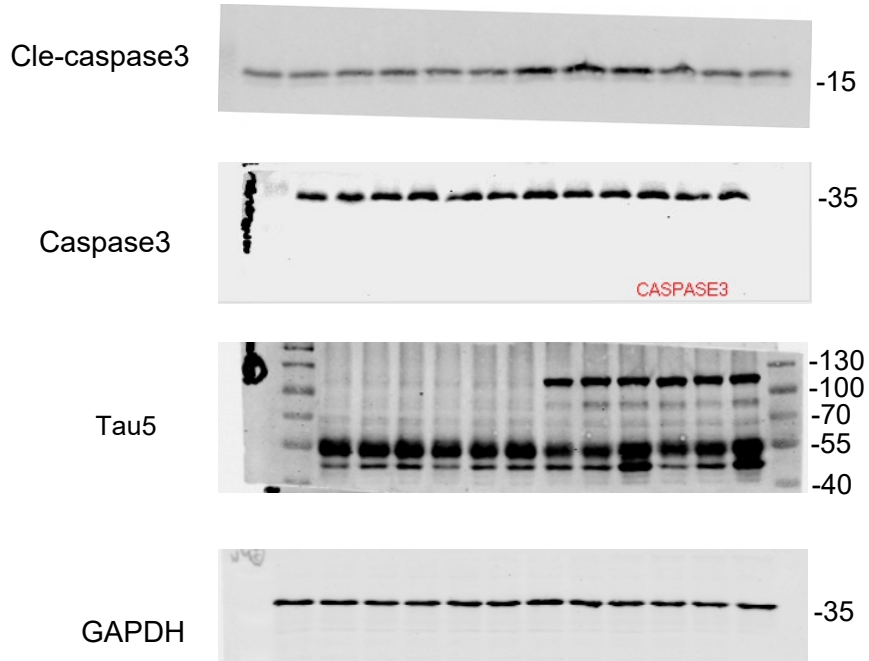

Supplement: mmc1.pdf [file mmc1.pdf]
